# Supplementary material
Source: publisher figshare collection journal article supplement (https://acs.figshare.com/ndownloader/files/4447714)
Supplement: Supplementary file 1 [file 4447714]

## SUPPORTING INFORMATION

### 1. NMR analysis of the synthesized PLL<sub>20</sub>-g<sub>3.5</sub>-PEG<sub>2/3.4</sub>-TG

The synthesized PLL<sub>20</sub>-g<sub>3.5</sub>-PEG<sub>2/3.4</sub>-TG copolymer was analyzed by <sup>1</sup>H NMR (D<sub>2</sub>O) and resulted in a copolymer with the following structure: PLL<sub>20</sub>-g<sub>4.4</sub>-PEG<sub>2/3.4</sub>-TG<sub>25%</sub>.

<sup>1</sup>H NMR (D<sub>2</sub>O) d:

- 0.83 (TG-peptide, -CH<sub>3</sub> valine side chains, d),
- 1.18-1.48 and 1.48-1.81 (PLL, -C<sub>α</sub>HC<sub>β</sub>H<sub>2</sub>C<sub>γ</sub>H<sub>2</sub>C<sub>δ</sub>H<sub>2</sub>C<sub>ε</sub>H<sub>2</sub>NH<sub>2</sub>, m),
- 1.81-2.48 (TG-peptide, side chains),
- 2.90 (PLL, -C<sub>α</sub>HC<sub>β</sub>H<sub>2</sub>C<sub>γ</sub>H<sub>2</sub>C<sub>δ</sub>H<sub>2</sub>C<sub>ε</sub>H<sub>2</sub>NH<sub>2</sub>, t),
- 3.05-3.14 (PLL and TG-peptide, -C<sub>α</sub>HC<sub>β</sub>H<sub>2</sub>C<sub>γ</sub>H<sub>2</sub>C<sub>δ</sub>H<sub>2</sub>C<sub>ε</sub>H<sub>2</sub>NHCO and side chains, m),
- 3.28 (mPEG, -OCH<sub>3</sub>, s),
- 3.60 (mPEG and PEG, -OCH<sub>2</sub>CH<sub>2</sub>-, m),
- 4.05 (TG-peptide, -NHC<sub>α</sub>HCO-, d),
- 4.21 (PLL and TG-peptide, -NHC<sub>α</sub>HCO-, m),
- 4.32 (TG-peptide, -NHC<sub>α</sub>HCO-, t),
- 4.45 (TG-peptide, -NHC<sub>α</sub>HCO-, t)

The grafting ratios were calculated from the NMR spectrum. The ratio between mPEG<sub>2000</sub> and PEG<sub>3400</sub>, to which the TG-peptide has been coupled, was determined from the integral value of the methoxy group of mPEG<sub>2000</sub> peak at 3.28 ppm and from the integral value of the ethyleneoxide group of both mPEG<sub>2000</sub> and PEG<sub>3400</sub> peaks between 3.42-3.73 ppm. Based on the signal from the methoxy group of mPEG<sub>2000</sub>, the value for one proton of mPEG<sub>2000</sub> is 0.36. This results in a total integral value for mPEG<sub>2000</sub> with 45 ethylene oxide units of 64.80 and leaves a signal of 36.03 for the 77 ethylene oxide unit of PEG<sub>3400</sub>. This represents a value for one proton of PEG<sub>3400</sub> of 0.12. Therefore the proportion of mPEG<sub>2000</sub> to PEG<sub>3400</sub> is 0.36 to 0.12 which is a ratio of 3 to 1.

Based on the signal at 0.83 ppm from the four methyl groups of the two valine residues in the TG-peptide and on the signals at 4.05, 4.32 and 4.45 ppm representing six protons from the C<sub>α</sub>H groups in the TG-peptide, one proton from the TG-peptide has an integral value of 0.12. This value is the same as that of the PEG<sub>3400</sub>. Therefore, each PEG<sub>3400</sub> is functionalized with one TG-peptide.

To calculate the ratio between the PEGs and PLL, the integral values from the C<sub>β</sub>H<sub>2</sub>, C<sub>γ</sub>H<sub>2</sub> and C<sub>δ</sub>H<sub>2</sub> groups of PLL representing 6 protons are used. One proton from PLL is represented by a value of 2.13 and one proton of the PEGs is represented by a value of 0.36 and 0.12. This results in a PLL-PEG grafting ratio of 4.4 to 1.

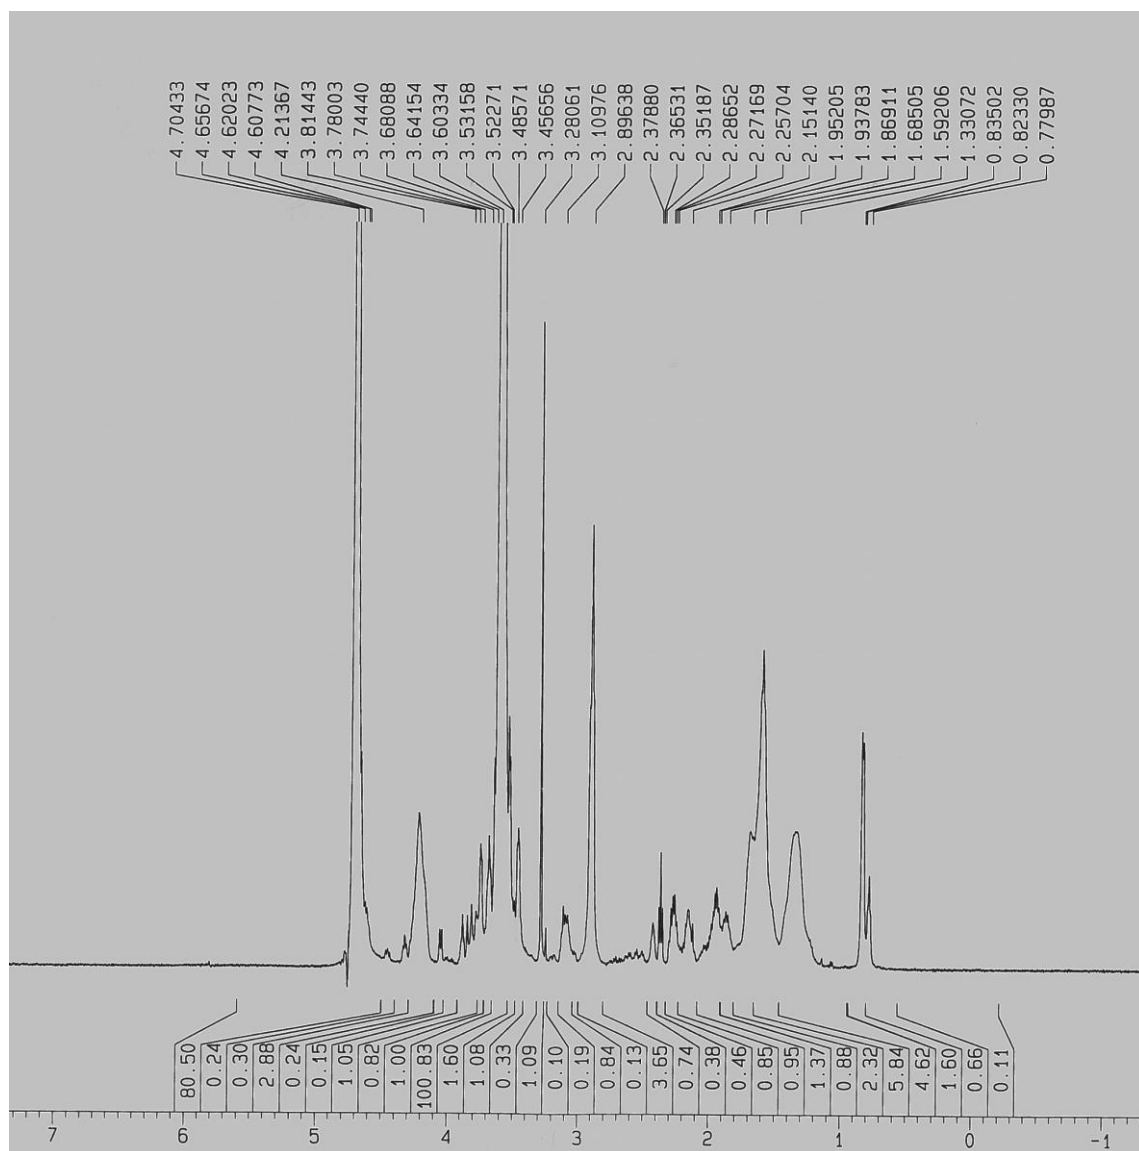

**Figure S1.** NMR of PLL-g-PEG-TG.

2. **In situ OWLS monitoring and quantification of PLL-g-PEG-TG adsorption on a titanium-coated waveguide and degree of resistance of the polymeric adlayer to serum adsorption.**

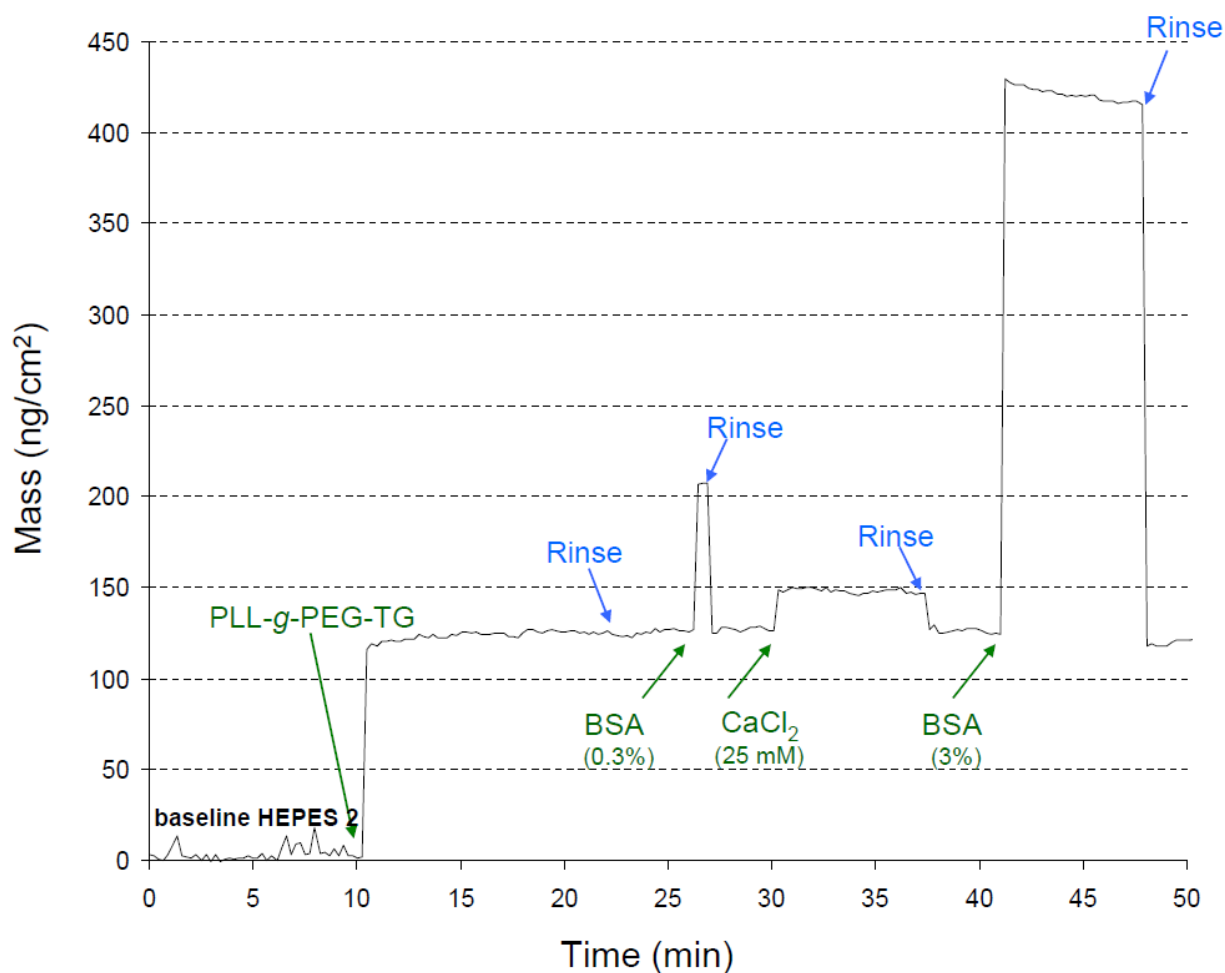

**Figure S2.** In situ OWLS PLL-g-PEG-TG adsorption and polymeric adlayer resistance to serum proteins ( $dn/dc = 0.139$ ).

### 3. Summary of PLL-g-PEG-TG characterization by <sup>1</sup>H-NMR and OWLS and theoretical peptide densities distance between them on the modified surfaces. Immobilization calculations on the surface.

PLL-g-PEG-TG characterization by H-NMR and OWLS. Theoretical peptide densities based on these experimental values

PLL-g-PEG-TG characterization

| Concept                                             | Remarks                | Units | Values   |
|-----------------------------------------------------|------------------------|-------|----------|
| Molecular weight PLL                                | (mol wt PLL)           | g/mol | 20,000   |
| N° Lys units                                        |                        |       | 96       |
| Molecular weight Lys UNIT                           | (mol wt Lys)           | g/mol | 208.3    |
| Molecular weight PLL-g-PEG-TG                       | calculated (0)         | g/mol | 78,513.7 |
| Molecular weight non-functionalized PEG side chains |                        | g/mol | 2,000    |
| Molecular weight functionalized PEG side chains     |                        | g/mol | 3,400.0  |
| Molecular weight TG                                 |                        | g/mol | 1,358.5  |
| Grafting ration                                     | (g)                    |       | 4.4      |
| Total number of PEG side chains                     |                        |       | 22       |
| Fraction of functionalized PEG                      | (P <sub>PEG-TG</sub> ) |       | 25%      |
| Fraction of non-functionalized PEG                  | (P <sub>PEG</sub> )    |       | 75%      |

In situ OWLS measurements

| Concept                                                             | Remarks           | Units              | Values    |
|---------------------------------------------------------------------|-------------------|--------------------|-----------|
| Mass of PLL-g-PEG-TG adsorbed on a TiO <sub>2</sub> waveguide       | (m <sub>a</sub> ) | ng/cm <sup>2</sup> | 132 ± 5   |
| BSA adsorption (non-fouling properties of the PLL-g-PEG-TG adlayer) |                   | ng/cm <sup>2</sup> | 1.8 ± 1.2 |
| Mass of PLL-g-PEG adsorbed on a Nb:O <sub>x</sub> waveguide         | (m <sub>a</sub> ) | ng/cm <sup>2</sup> | 170       |

Theoretical TG peptide density and distance between the moieties on a surface

| Concept                                                         | Remarks        | Units                | Values |
|-----------------------------------------------------------------|----------------|----------------------|--------|
| TG peptide density on a TiO <sub>2</sub> surface                | (p)            | pmol/cm <sup>2</sup> | 9.1    |
| Distance between the TG moieties on a TiO <sub>2</sub> surface  | calculated (2) | nm                   | 4.6    |
| TG peptide density on a Nb:O <sub>x</sub> surface               | (p)            | pmol/cm <sup>2</sup> | 11.7   |
| Distance between the TG moieties on a Nb:O <sub>x</sub> surface | calculated (2) | nm                   | 4.0    |

Maximum theoretical peptide densities on a surface and Immobilization amounts.

| Concept                                                                     | Remarks                                       | Units              | Values       |
|-----------------------------------------------------------------------------|-----------------------------------------------|--------------------|--------------|
| Molecular weight 8-arm Lys-PEG                                              |                                               | g/mol              | 53,744.0     |
| Molecular weight Lys-FITC                                                   |                                               | g/mol              | 966.2        |
| Molecular weight Lys-RGD                                                    |                                               | g/mol              | 1,018.3      |
| Mass of 8-arm Lys-PEG immobilized on a TiO <sub>2</sub> surface (one-step). | calculated (3)                                | ng/cm <sup>2</sup> | 487.3        |
| Mass of Lys-FITC immobilized on a TiO <sub>2</sub> surface (one-step).      | calculated (3)                                | ng/cm <sup>2</sup> | 8.8          |
| Mass of Lys-RGD immobilized on a TiO <sub>2</sub> surface                   | calculated (3)                                | ng/cm <sup>2</sup> | 9.2          |
| Mass of Lys-RGD immobilized on a Nb:O <sub>x</sub> surface                  | calculated (3)                                | ng/cm <sup>2</sup> | 11.9         |
| Mass of 8-arm Lys-PEG immobilized on a TiO <sub>2</sub> surface (one-step). | calculated (3')                               | ng/cm <sup>2</sup> | 39.0         |
| Molecular weight TG-VEGF                                                    |                                               |                    | 32,000.0     |
| Molecular weight 8-arm TG-PEG                                               |                                               |                    | 50,868.0     |
| Mass of TG-VEGF immobilized on a TiO <sub>2</sub> surface (two-steps).      | calculated (4); 1mol Lys-PEG to 1mol TG-VEGF  | ng/cm <sup>2</sup> | 15.7 ± 2     |
| Mass of TG-VEGF immobilized on a TiO <sub>2</sub> surface (two-steps).      | calculated (4'); 1mol Lys-PEG to 4mol TG-VEGF | ng/cm <sup>2</sup> | 62.9 ± 7.9   |
| Mass of TG-PEG immobilized on a TiO <sub>2</sub> surface (two-steps).       | calculated (5); 1mol Lys-PEG to 1mol TG-PEG   | ng/cm <sup>2</sup> | 25 ± 3.1     |
| Mass of TG-PEG immobilized on a TiO <sub>2</sub> surface (two-steps).       | calculated (5'); 1mol Lys-PEG to 4mol TG-PEG  | ng/cm <sup>2</sup> | 100 ± 12.5   |
| Mass of LYS-PEG immobilized on a TiO <sub>2</sub> surface (three-steps).    | calculated (6); 1mol TG-PEG to 1mol Lys-PEG   | ng/cm <sup>2</sup> | 25.6 ± 3.7   |
| Mass of LYS-PEG immobilized on a TiO <sub>2</sub> surface (three-steps).    | calculated (6'); 1mol TG-PEG to 4mol Lys-PEG  | ng/cm <sup>2</sup> | 102.3 ± 14.8 |

- (0) [ mol wt (PLL) + [ mol wt (PLL) / mol wt (Lys) \* (1 / g) ] \* [(P<sub>PEG</sub> / 100) \* mol wt (PEG)] + [(P<sub>PEG-TG</sub> / 100) \* mol wt (PEG-TG)] ]
- (1) [ [mol wt (PLL) / (mol wt (Lys) \* g) ] \* [ (m<sub>a</sub> / mol wt (Pol)) \* P<sub>PEG-TG</sub> ] ]
- (2) [ [(2 / 3) \* (1 / (p \* Avogadro's number))] ]<sup>10</sup>
- (3) [ p / mol wt (immobilized peptide via FXIIla) ]; 100 % efficiency of the enzyme, all TG domains on the surface react with a Lys substrate
- (3') [ p / mol wt (immobilized peptide via FXIIla) \* 0.8 ]; 80 % efficiency of the enzyme, 1/10 TG domains on the surface react with a Lys substrate
- (4) [ experimental 8-arm Lys-PEG immobilized (26.4 ± 3.3) / mol wt (8-arm Lys-PEG) \* mol wt (TG-VEGF) ]
- (4') [ experimental 8-arm Lys-PEG immobilized (26.4 ± 3.3) / mol wt (8-arm Lys-PEG) \* mol wt (TG-VEGF) ]
- (5) [ experimental 8-arm Lys-PEG immobilized (26.4 ± 3.3) / mol wt (8-arm Lys-PEG) \* mol wt (8-arm TG-PEG) ]
- (5') [ experimental 8-arm Lys-PEG immobilized (26.4 ± 3.3) / mol wt (8-arm Lys-PEG) \* mol wt (8-arm TG-PEG) ]
- (6) [ experimental 8-arm TG-PEG immobilized (24.2 ± 3.5) / mol wt (8-arm TG-PEG) \* mol wt (8-arm Lys-PEG) ]
- (6') [ experimental 8-arm TG-PEG immobilized (24.2 ± 3.5) / mol wt (8-arm TG-PEG) \* mol wt (8-arm Lys-PEG) ]

**Figure S3.** Summary of PLL-g-PEG-TG characterization by <sup>1</sup>H-NMR and OWLS. Maximum theoretical peptide densities and distance between the TG moieties on the modified surfaces. Immobilization amounts (theoretical based on experimental values).

#### 4. Representative OWLS experiment of enzymatic immobilization.

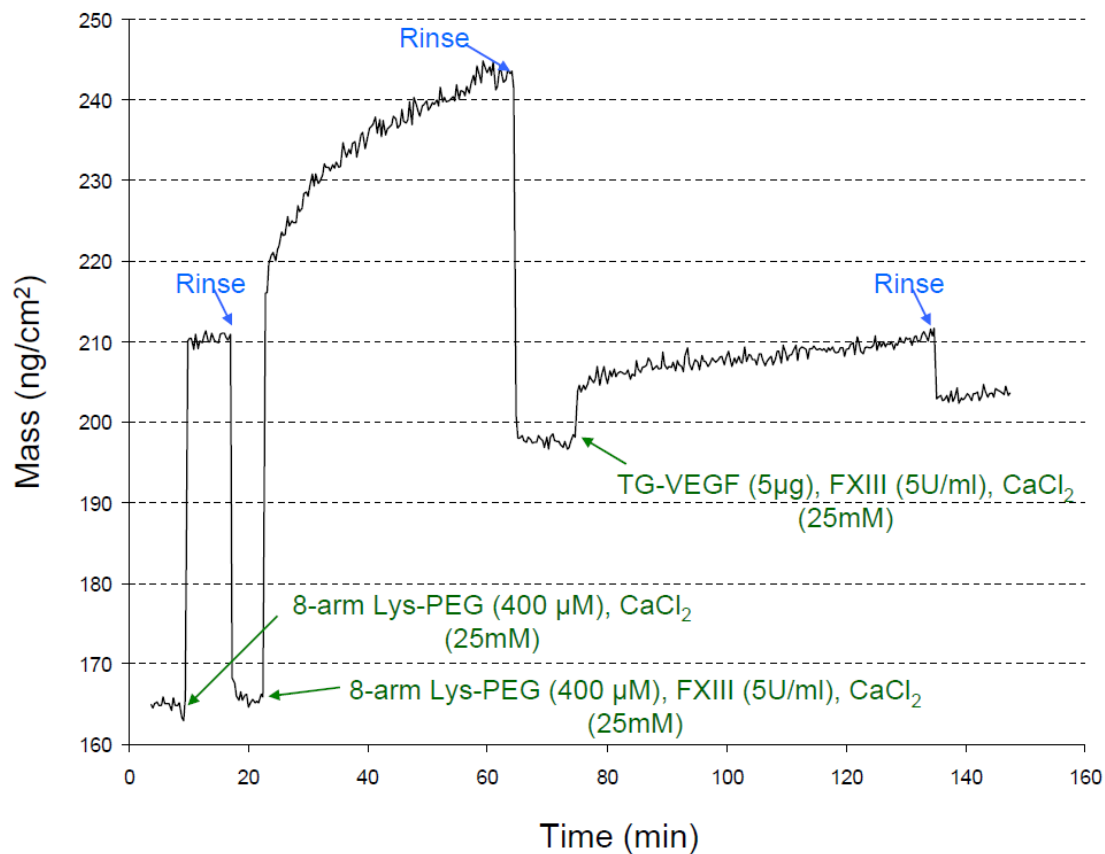

**Figure S4.** *In situ* OWLS immobilization of 8-arm Lys-PEG followed by TG-VEGF<sub>121</sub>. First a negative control is shown (8-arm Lys-PEG in absence of FXIII). No absorption is observed. Next, immobilization of 8-arm Lys-PEG is monitored and followed by immobilization of TG-VEGF<sub>121</sub>. The dn/dc for this graph is 0.139 (for PEG-based molecules. A dn/dc = 0.182 was considered for calculations involving TG-VEGF as mention in the Materials and Methods section). (Not real starting time).
